# Supplementary material for: In Vitro Anti-Influenza A Virus H1N1 Effect of Sesquiterpene-Rich Extracts of Carpesium abrotanoides
Source: MDPI journal article supplement (doi:10.3390/molecules27238313), 2022-11-29

## Supplementary Materials

# In Vitro Anti-Influenza A Virus H1N1 Effect of Sesquiterpene-Rich Extracts of *Carpesium abrotanoides*

Li Li <sup>1,†</sup>, Shenghui Yang <sup>2,†</sup>, Dilu Chen <sup>1</sup>, Zhihuang Wu <sup>2</sup>, Meijun Zhang <sup>2</sup>, Fang Yang <sup>3</sup>, Li Qin <sup>1,4,\*</sup>  
and Xiaojiang Zhou <sup>1,\*</sup>

<sup>1</sup> College of Pharmacy, Hunan University of Chinese Medicine,  
Changsha 410208, China

<sup>2</sup> College of Medicine, Hunan University of Chinese Medicine,  
Changsha 410208, China

<sup>3</sup> Changde Institute for Food Inspection, Changde 415000, China

<sup>4</sup> Laboratory of Stem Cell Regulation with Chinese Medicine and Its Application,  
Hunan University of Chinese Medicine, Changsha 410208, China

\* Correspondence: lqin1011@126.com (L.Q.); 003568@hnucm.edu.cn (X.Z.);  
Tel.: +86-731-88458238 (L.Q.); +86-731-88458234 (X.Z.);  
Fax: +86-731-88458227 (L.Q. & X.Z.)

† These authors contributed equally to this work.

## List of Supplementary Materials

| List of contents                                                                                    | Page |
|-----------------------------------------------------------------------------------------------------|------|
| <b>Figure S1.</b> The $^1\text{H}$ NMR spectrum of compound (1) in $\text{CD}_3\text{OD}$ .....     | S3   |
| <b>Figure S2.</b> The $^{13}\text{C}$ NMR spectrum of compound (1) in $\text{CD}_3\text{OD}$ .....  | S3   |
| <b>Figure S3.</b> The DEPT spectrum of compound (1) in $\text{CD}_3\text{OD}$ .....                 | S4   |
| <b>Figure S4.</b> The $^1\text{H}$ NMR spectrum of compound (2) in $\text{CD}_3\text{OD}$ .....     | S5   |
| <b>Figure S5.</b> The $^{13}\text{C}$ NMR spectrum of compound (2) in $\text{CD}_3\text{OD}$ .....  | S5   |
| <b>Figure S6.</b> The DEPT spectrum of compound (2) in $\text{CD}_3\text{OD}$ .....                 | S6   |
| <b>Figure S7.</b> The $^1\text{H}$ NMR spectrum of compound (3) in $\text{CD}_3\text{OD}$ .....     | S7   |
| <b>Figure S8.</b> The $^{13}\text{C}$ NMR spectrum of compound (3) in $\text{CD}_3\text{OD}$ .....  | S7   |
| <b>Figure S9.</b> The DEPT spectrum of compound (3) in $\text{CD}_3\text{OD}$ .....                 | S8   |
| <b>Figure S10.</b> The $^1\text{H}$ NMR spectrum of compound (4) in $\text{CD}_3\text{OD}$ .....    | S9   |
| <b>Figure S11.</b> The $^{13}\text{C}$ NMR spectrum of compound (4) in $\text{CD}_3\text{OD}$ ..... | S9   |
| <b>Figure S12.</b> The DEPT spectrum of compound (4) in $\text{CD}_3\text{OD}$ .....                | S10  |
| <b>Figure S13.</b> The $^1\text{H}$ NMR spectrum of compound (5) in $\text{CD}_3\text{OD}$ .....    | S11  |
| <b>Figure S14.</b> The $^{13}\text{C}$ NMR spectrum of compound (5) in $\text{CD}_3\text{OD}$ ..... | S11  |
| <b>Figure S15.</b> The DEPT spectrum of compound (5) in $\text{CD}_3\text{OD}$ .....                | S12  |

**Figure S1.** The  $^1\text{H}$  NMR spectrum of compound (**1**) in  $\text{CD}_3\text{OD}$

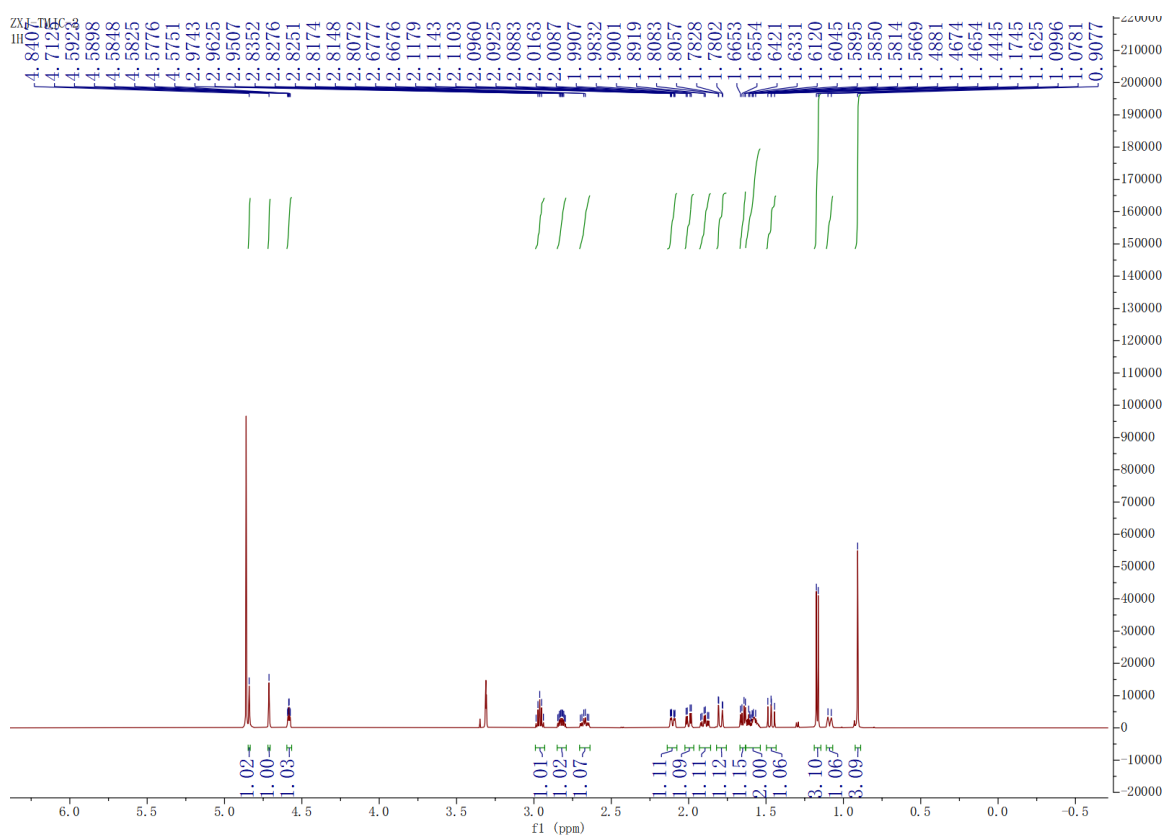

**Figure S2.** The  $^{13}\text{C}$  NMR spectrum of compound (**1**) in  $\text{CD}_3\text{OD}$

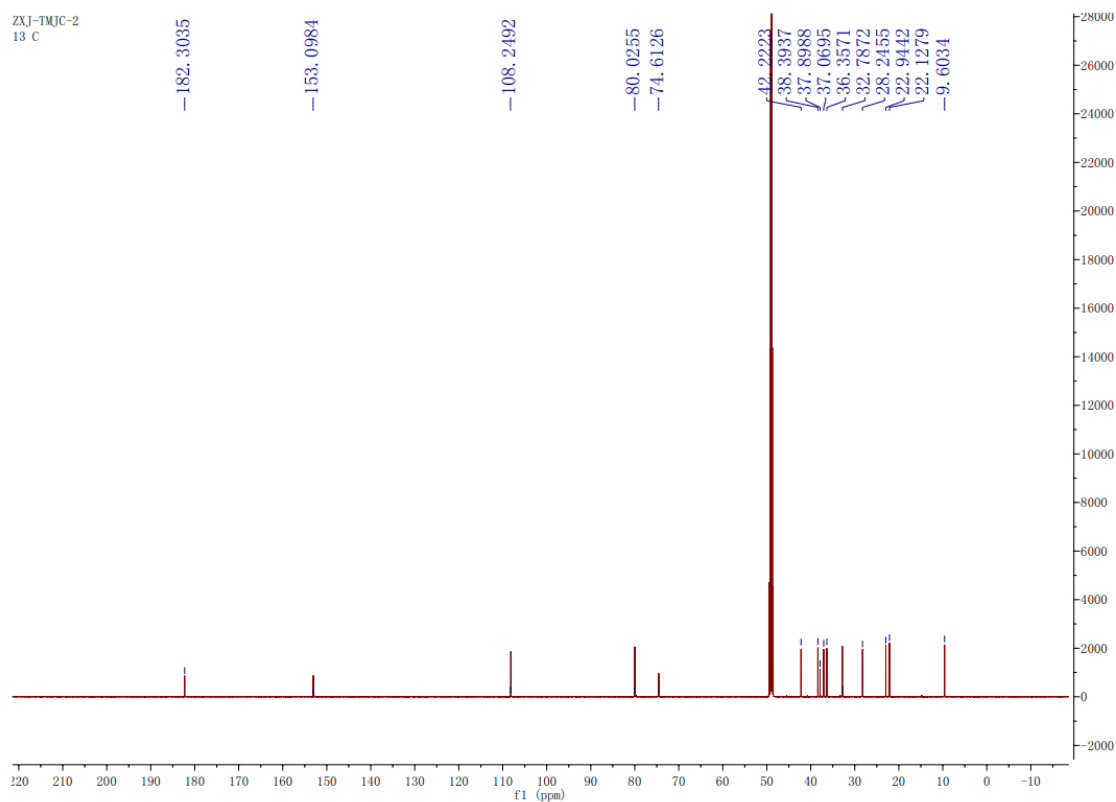

**Figure S3.** The DEPT spectrum of compound (**1**) in CD<sub>3</sub>OD

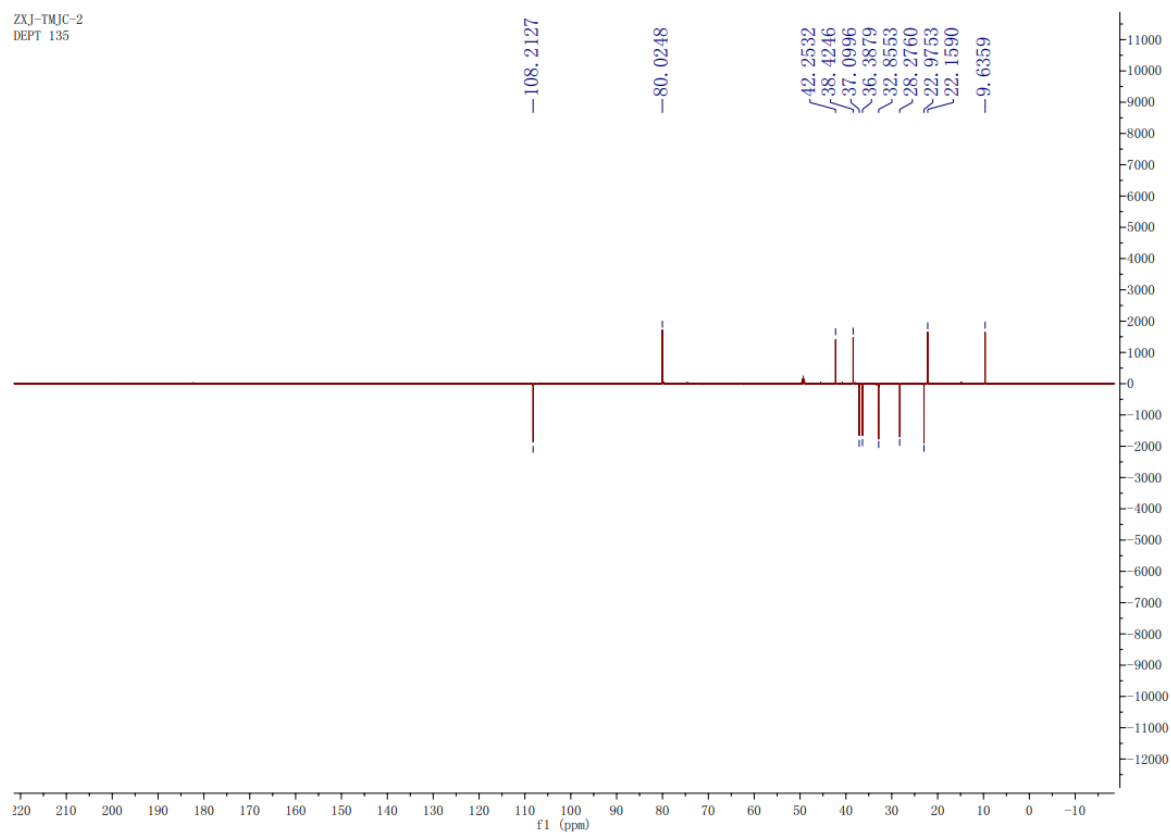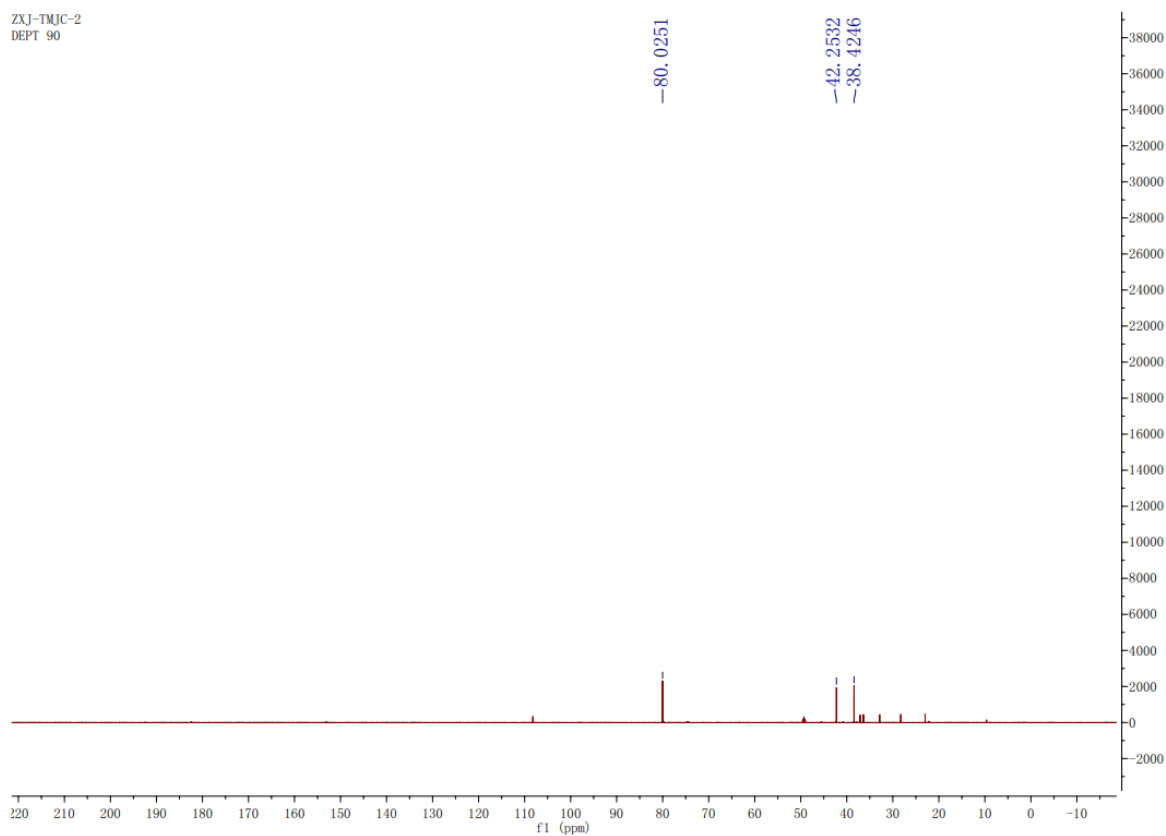

**Figure S4.** The  $^1\text{H}$  NMR spectrum of compound (**2**) in  $\text{CD}_3\text{OD}$

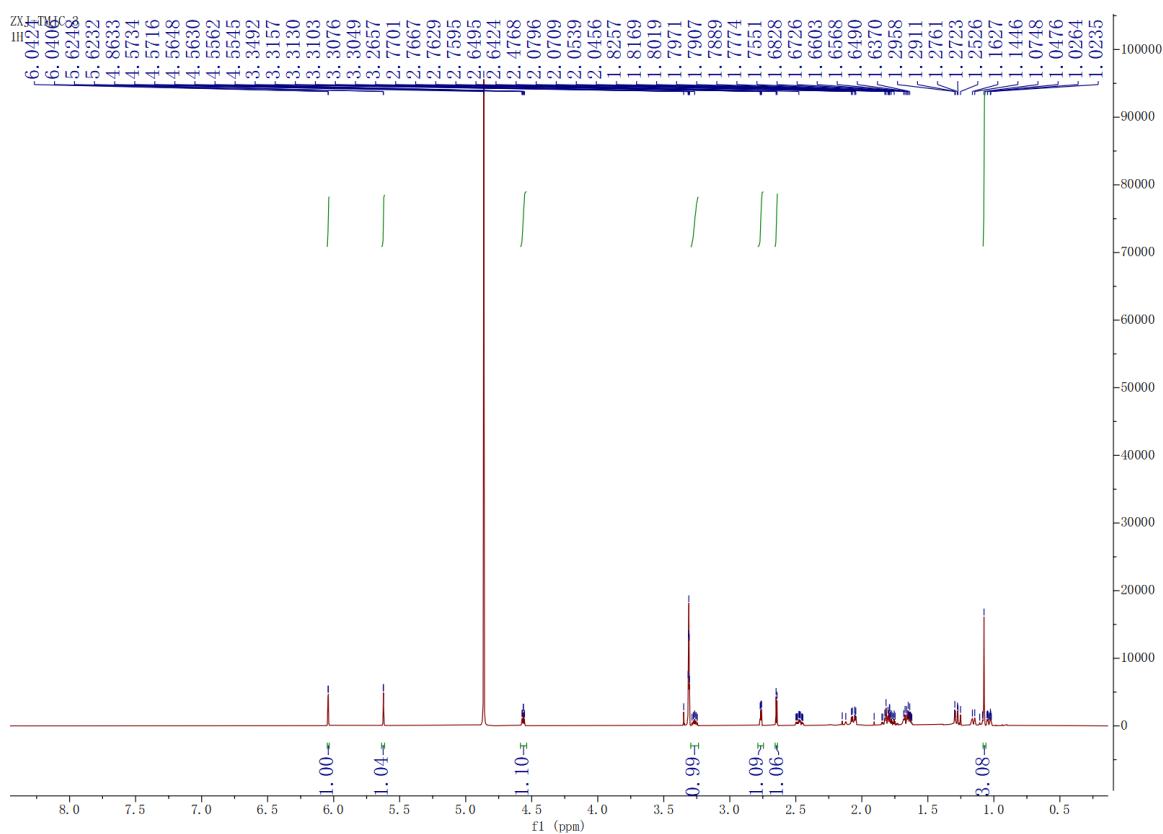

**Figure S5.** The  $^{13}\text{C}$  NMR spectrum of compound (**2**) in  $\text{CD}_3\text{OD}$

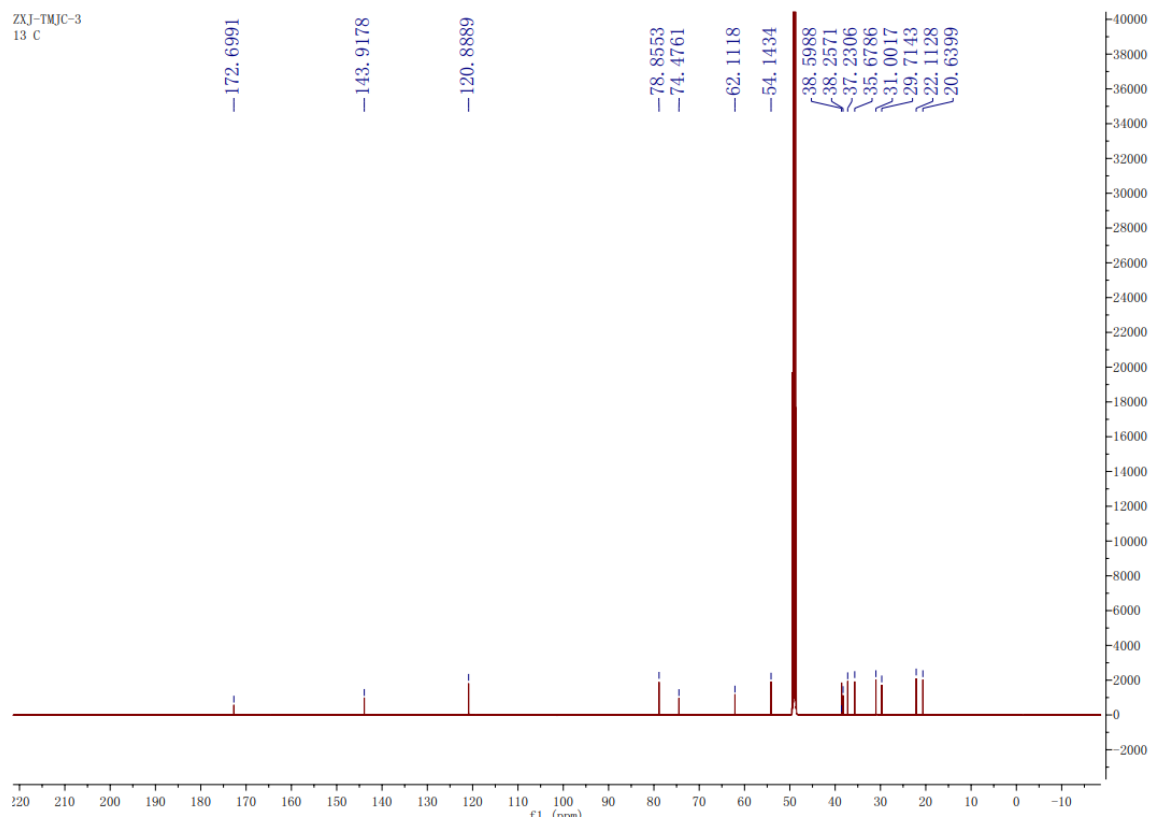

**Figure S6.** The DEPT spectrum of compound (**2**) in CD<sub>3</sub>OD

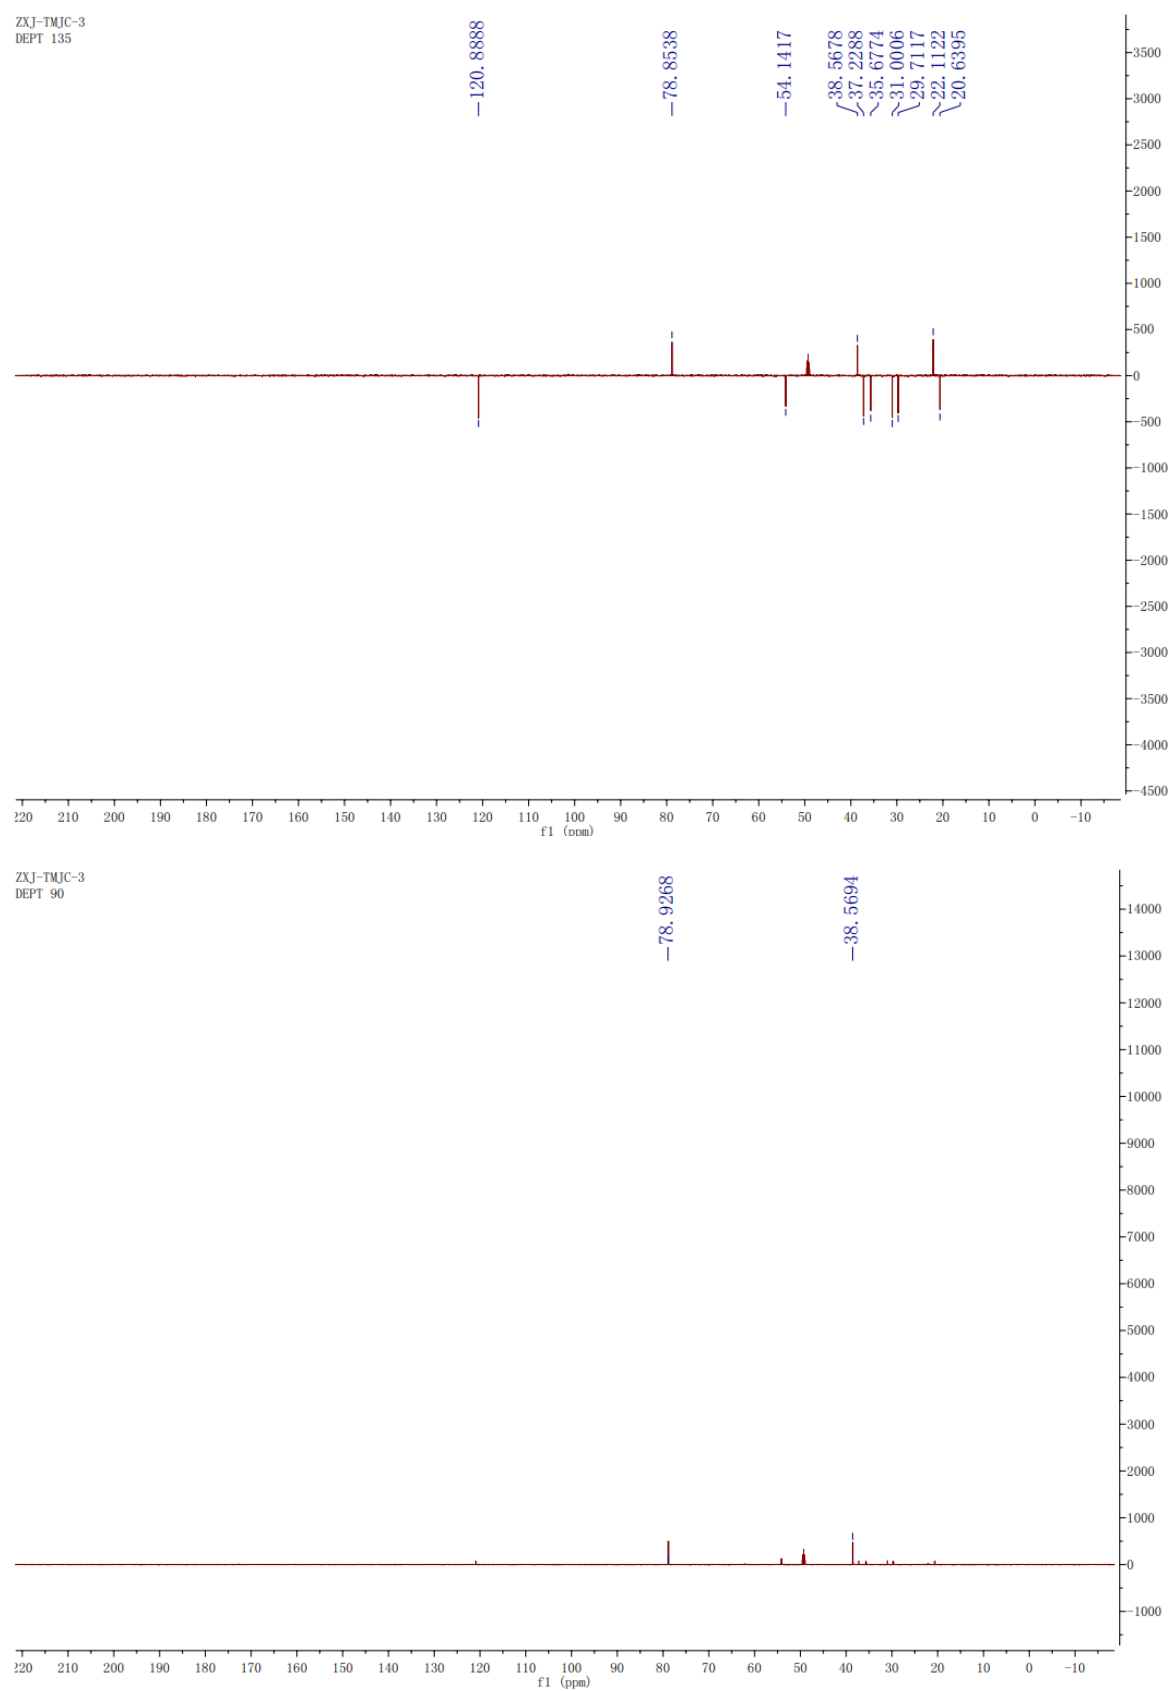

**Figure S7.** The  $^1\text{H}$  NMR spectrum of compound (3) in  $\text{CD}_3\text{OD}$

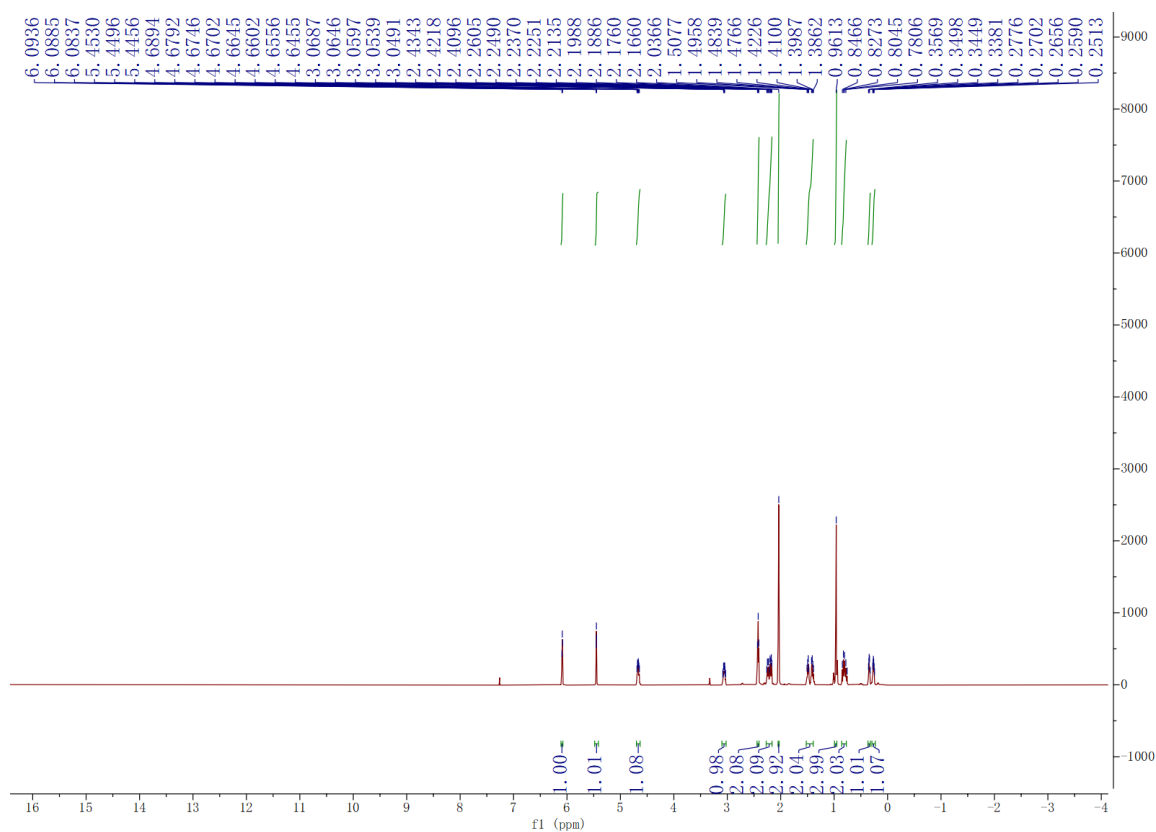

**Figure S8.** The  $^{13}\text{C}$  NMR spectrum of compound (3) in  $\text{CD}_3\text{OD}$

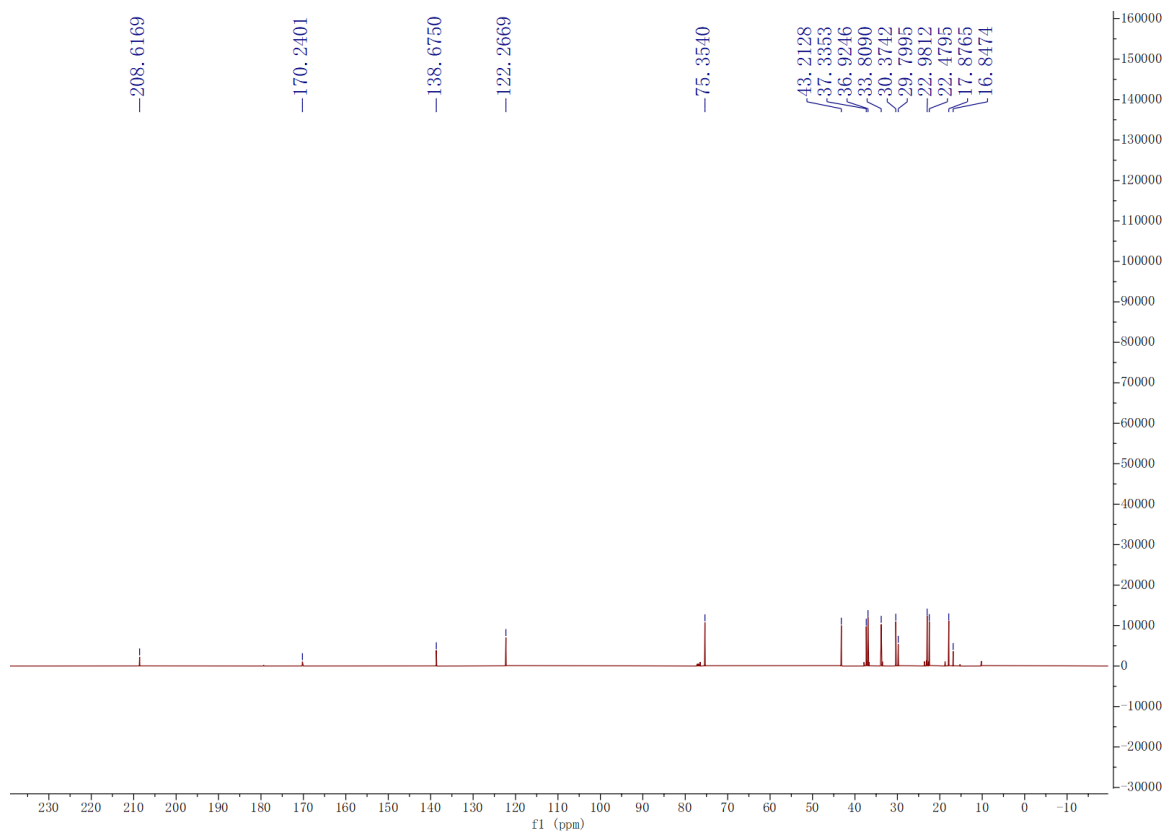

**Figure S9.** The DEPT spectrum of compound (**3**) in CD<sub>3</sub>OD

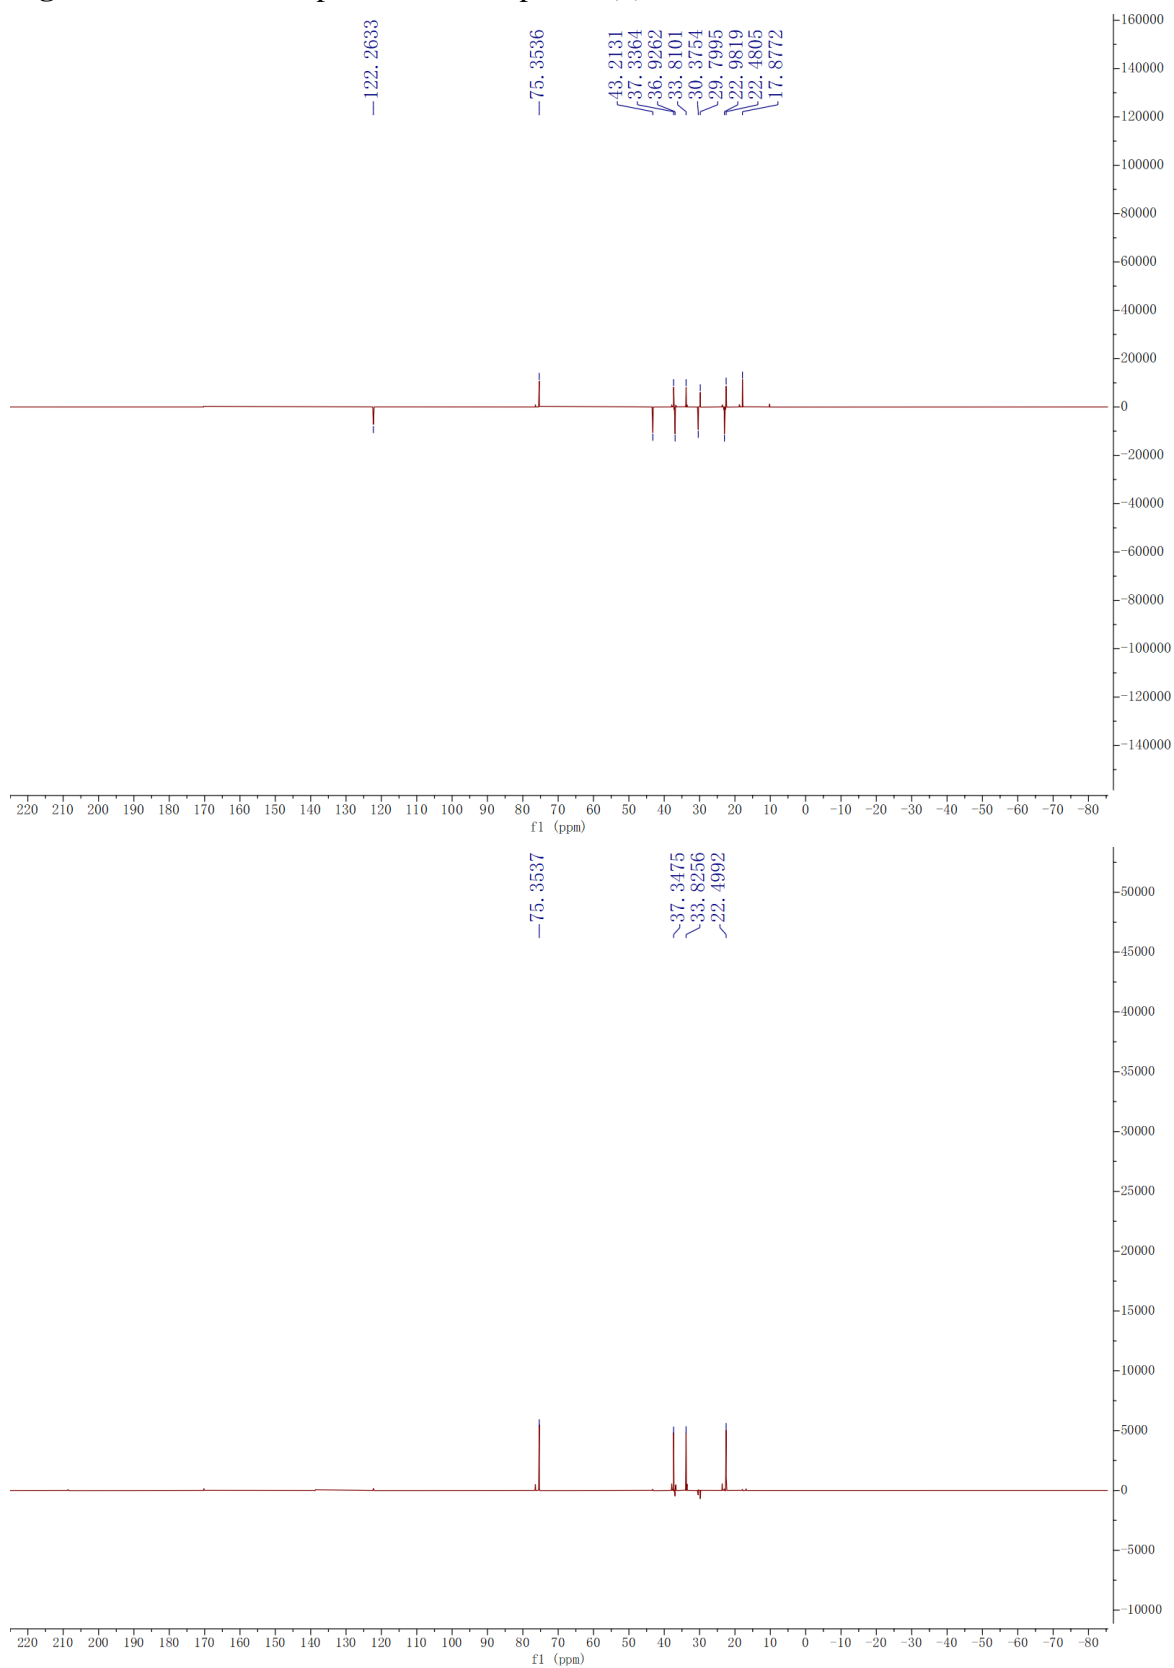



**Figure S10.** The  $^1\text{H}$  NMR spectrum of compound (4) in  $\text{CD}_3\text{OD}$

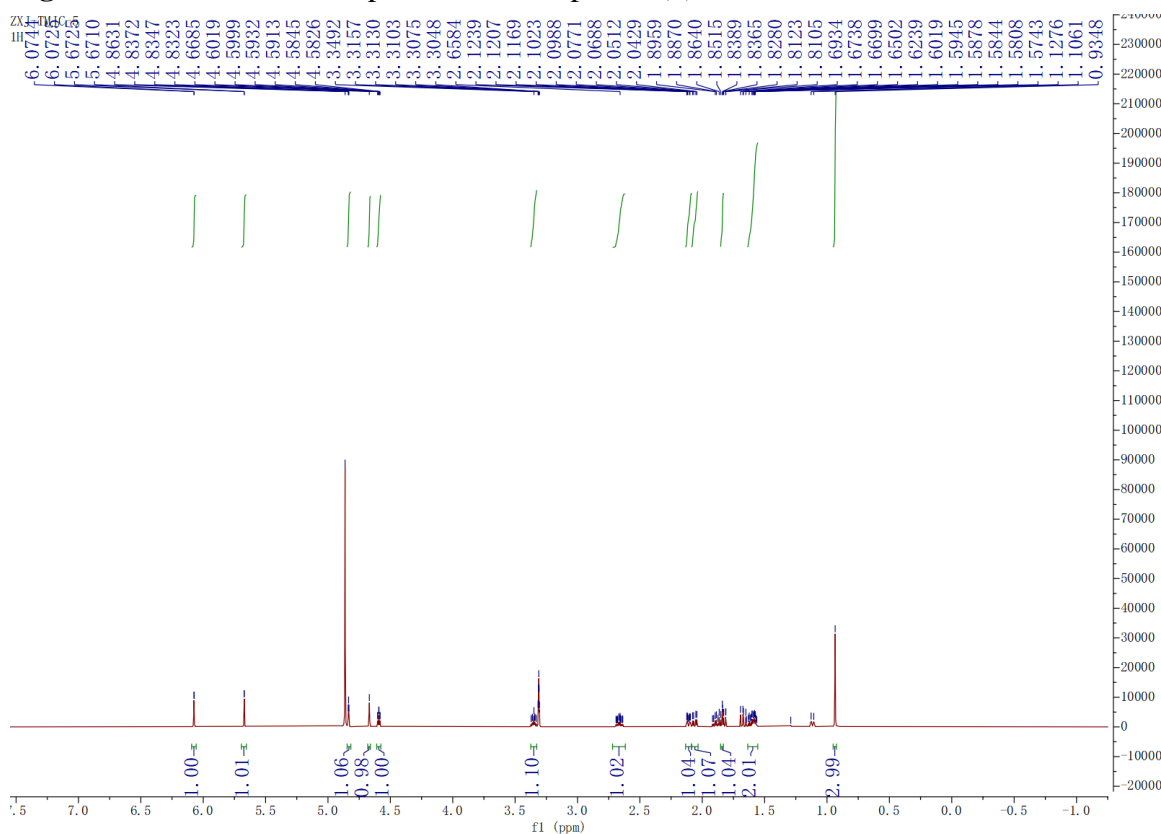

**Figure S11.** The  $^{13}\text{C}$  NMR spectrum of compound (4) in  $\text{CD}_3\text{OD}$

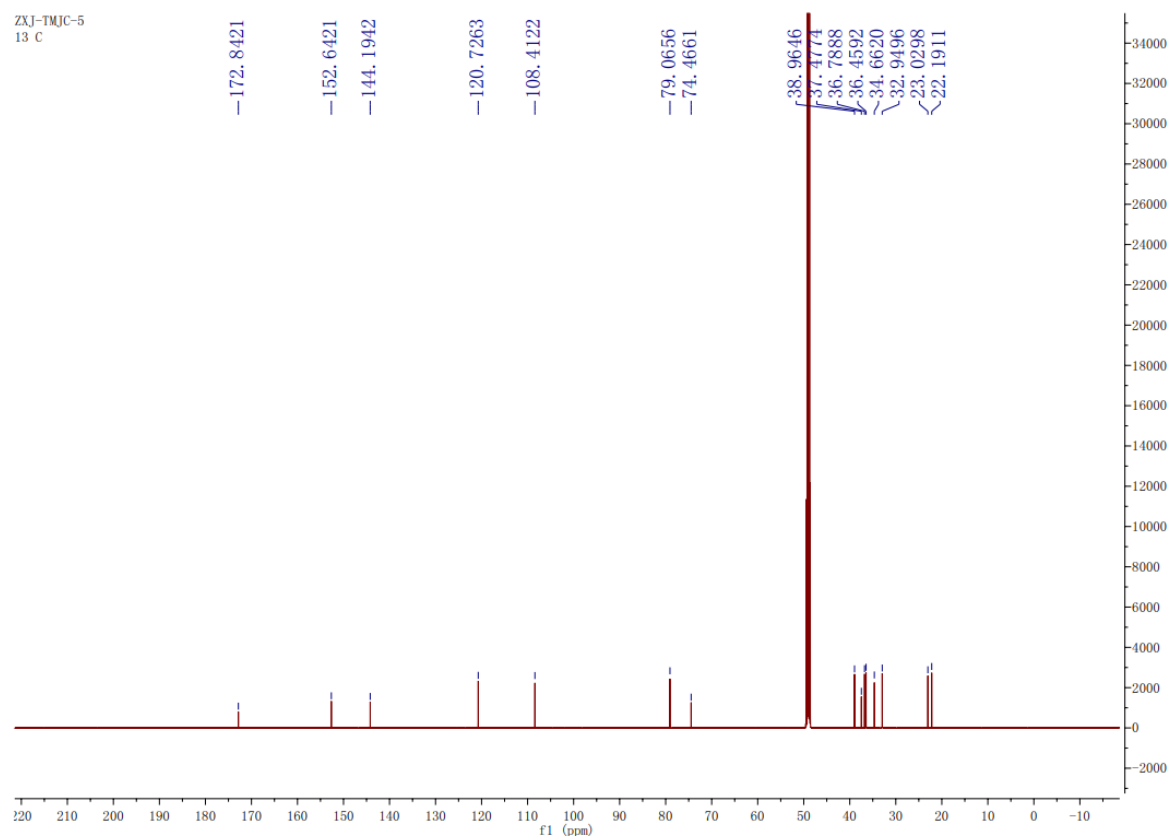

**Figure S12.** The DEPT spectrum of compound (**4**) in CD<sub>3</sub>OD

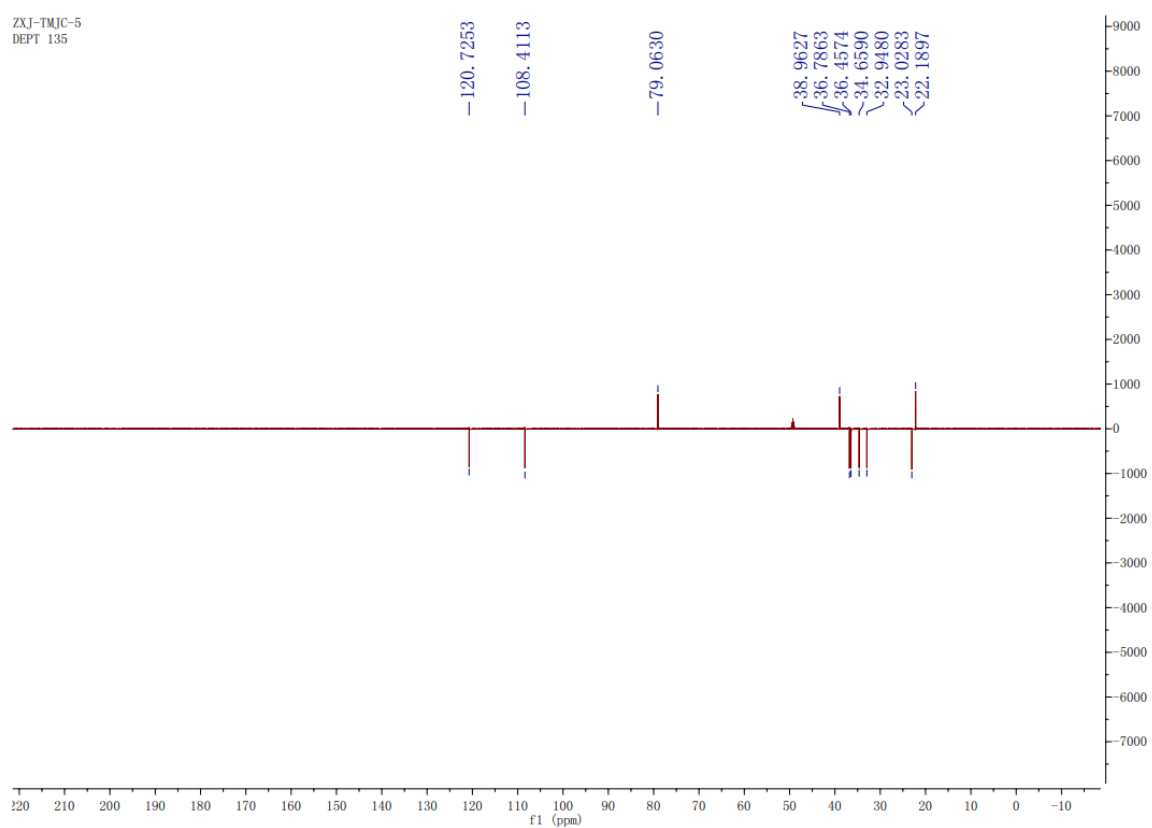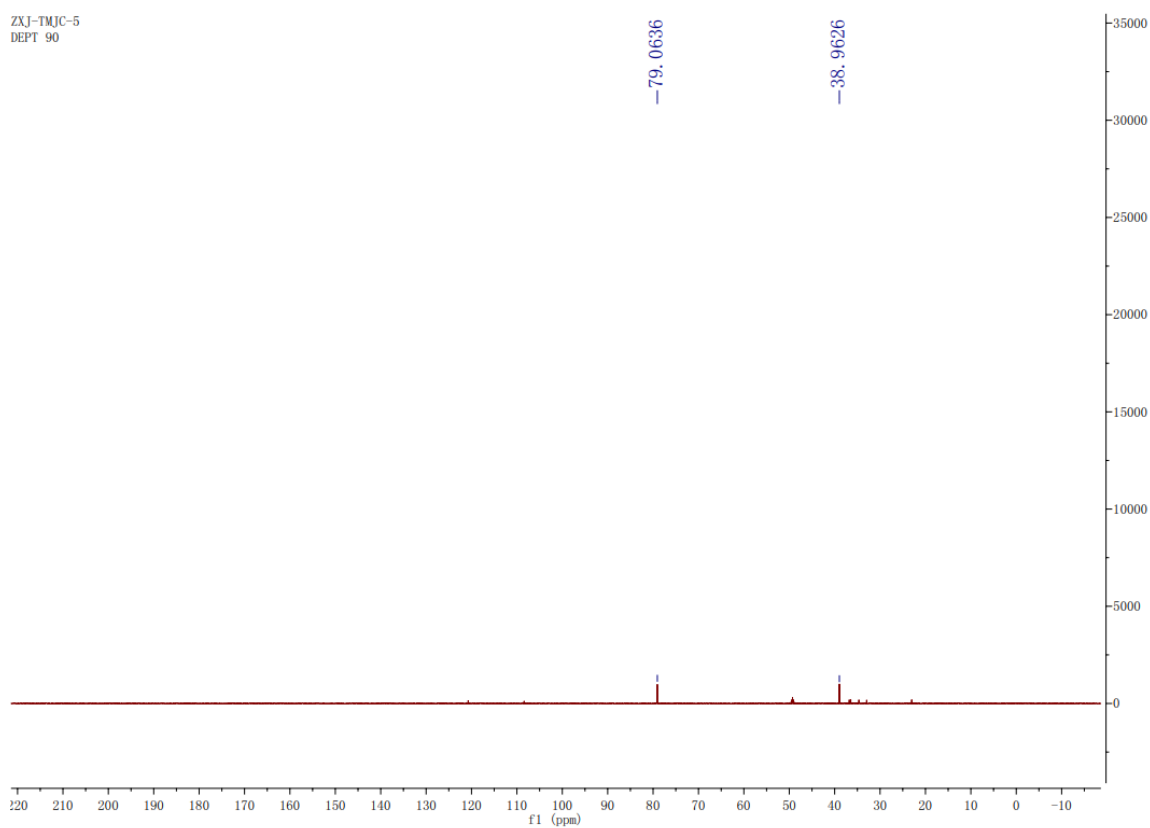

**Figure S13.** The  $^1\text{H}$  NMR spectrum of compound (**5**) in  $\text{CD}_3\text{OD}$

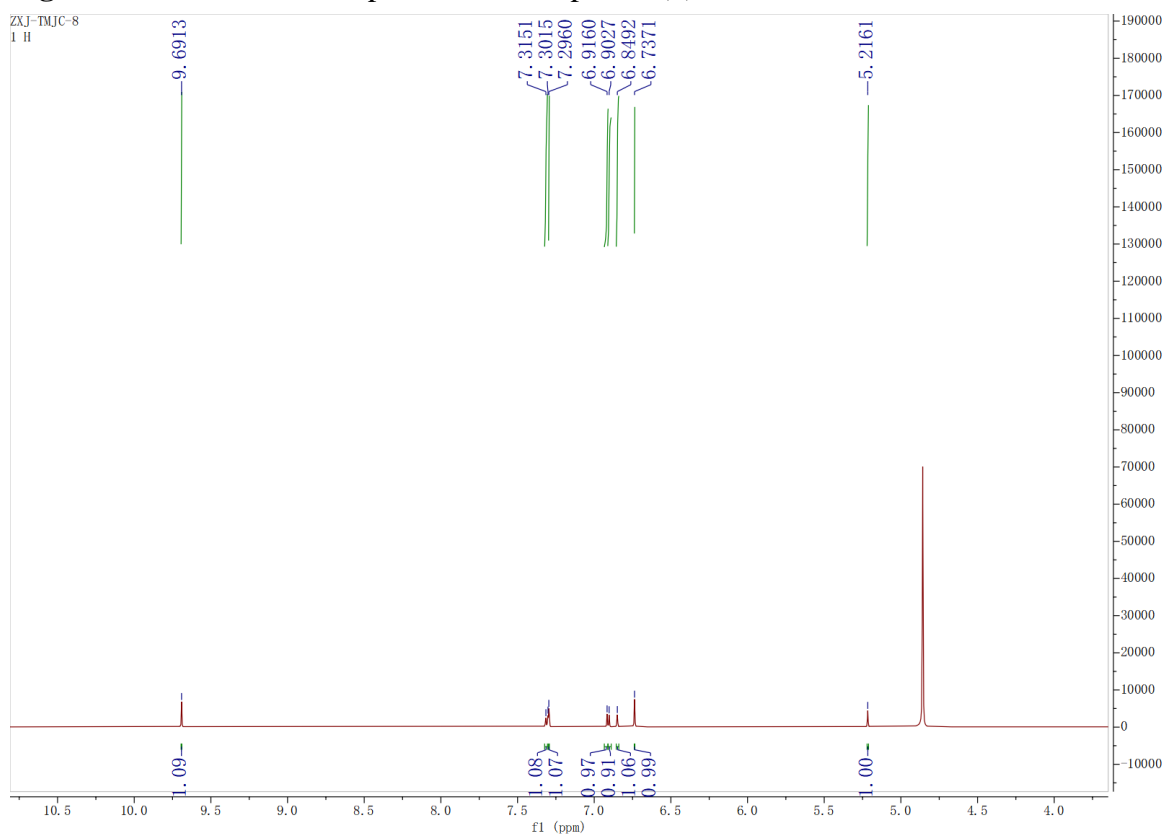

**Figure S14.** The  $^{13}\text{C}$  NMR spectrum of compound (**5**) in  $\text{CD}_3\text{OD}$

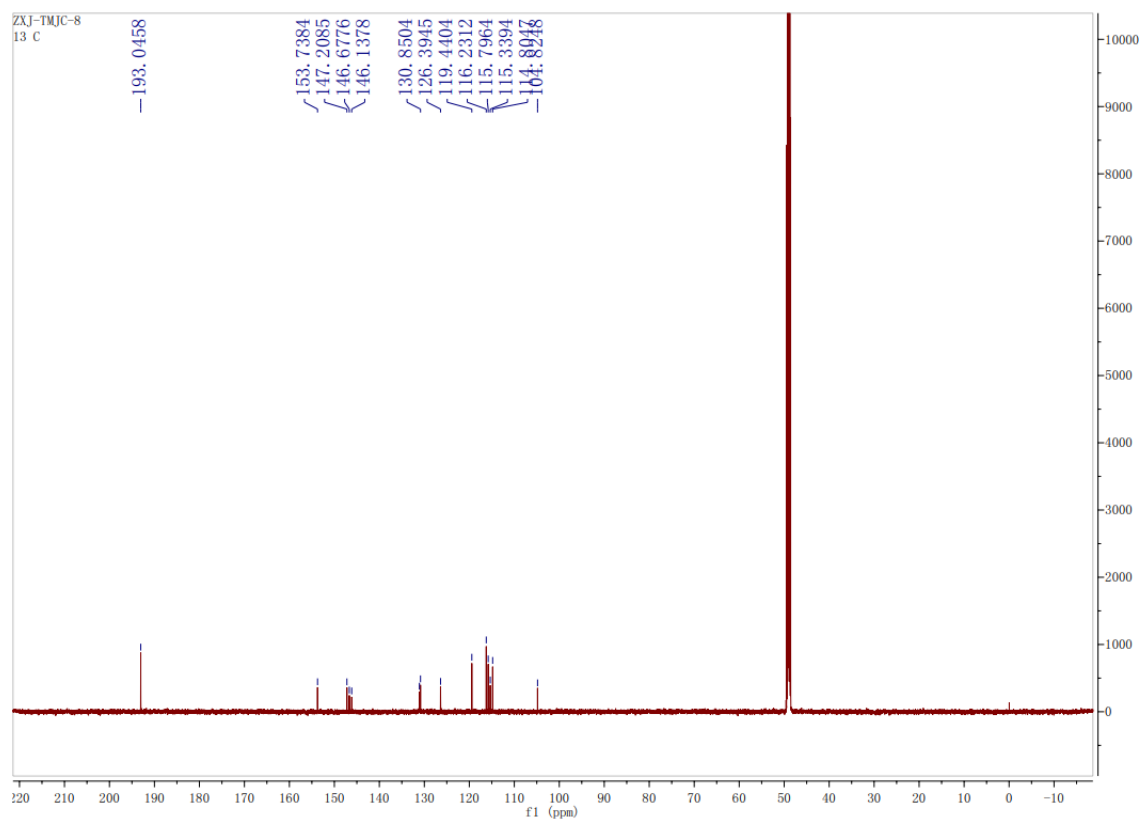

**Figure S15.** The DEPT spectrum of compound (**5**) in CD<sub>3</sub>OD

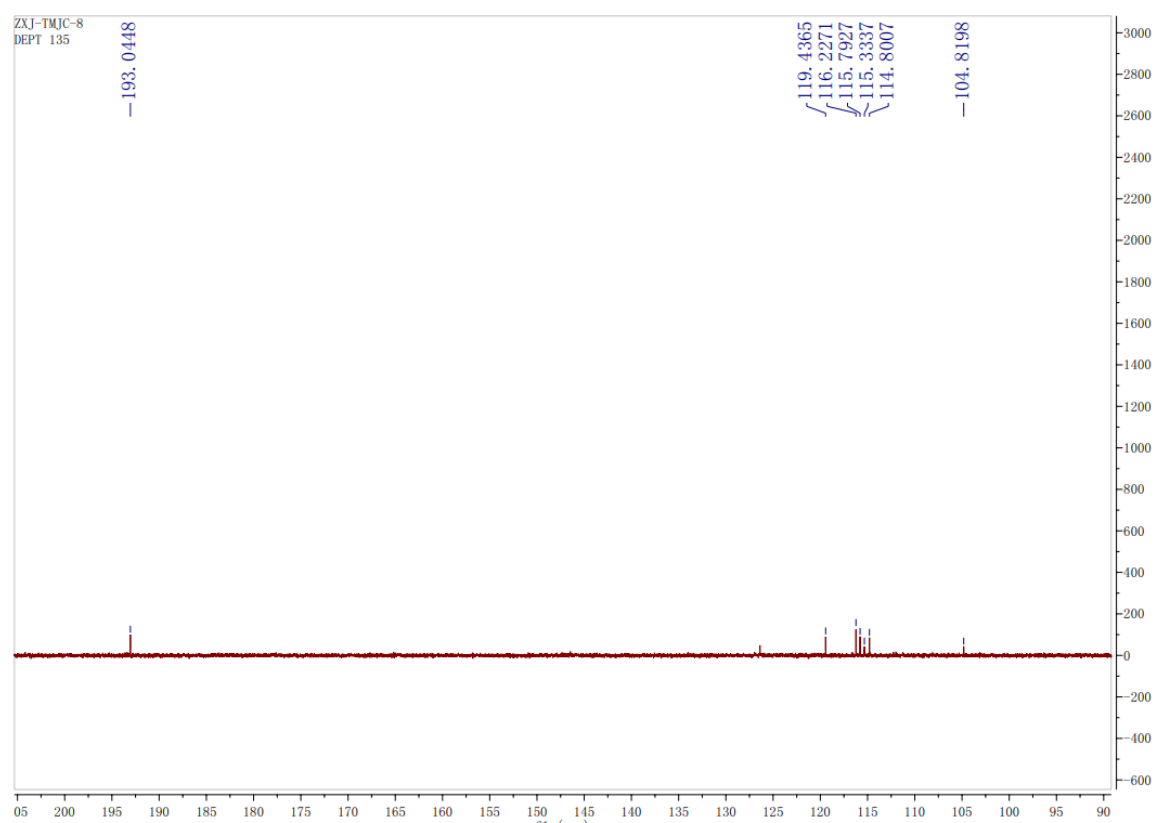

Supplement: s1 [file s1]
